# Supplementary material for: Graphical-model framework for automated annotation of cell identities in dense cellular images
Source: eLife journal article supplement (doi:10.7554/elife.60321), 2021-02-24

# Variability in absolute positions of neurons

**A**

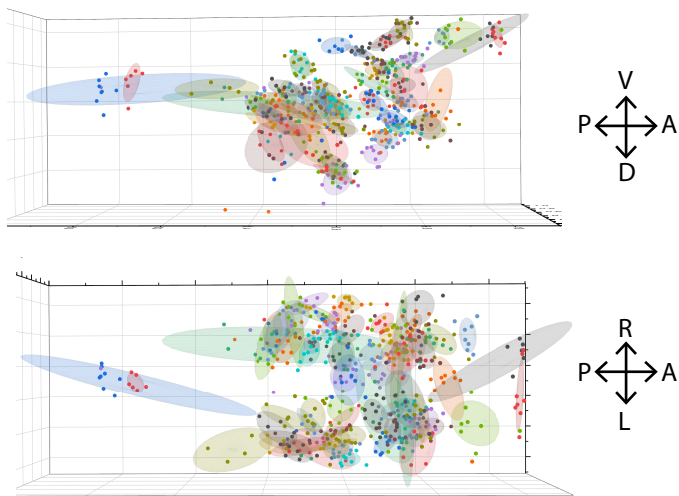

**B**

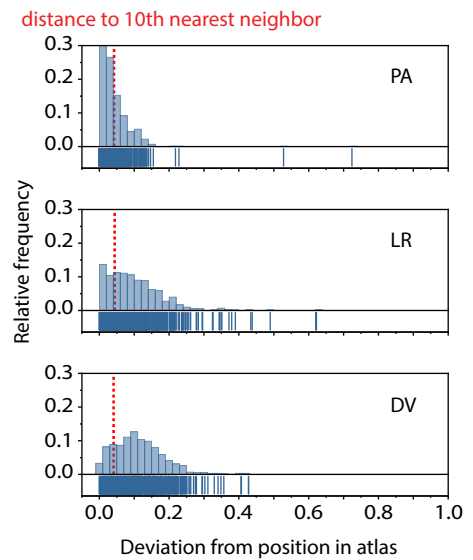

# Variability in relative positional relationships of neurons

**C**

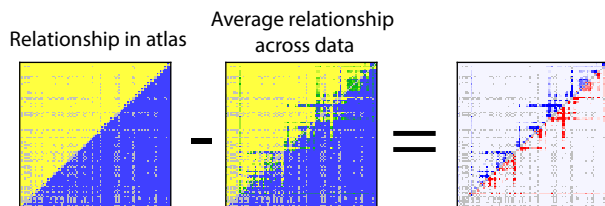

**D**

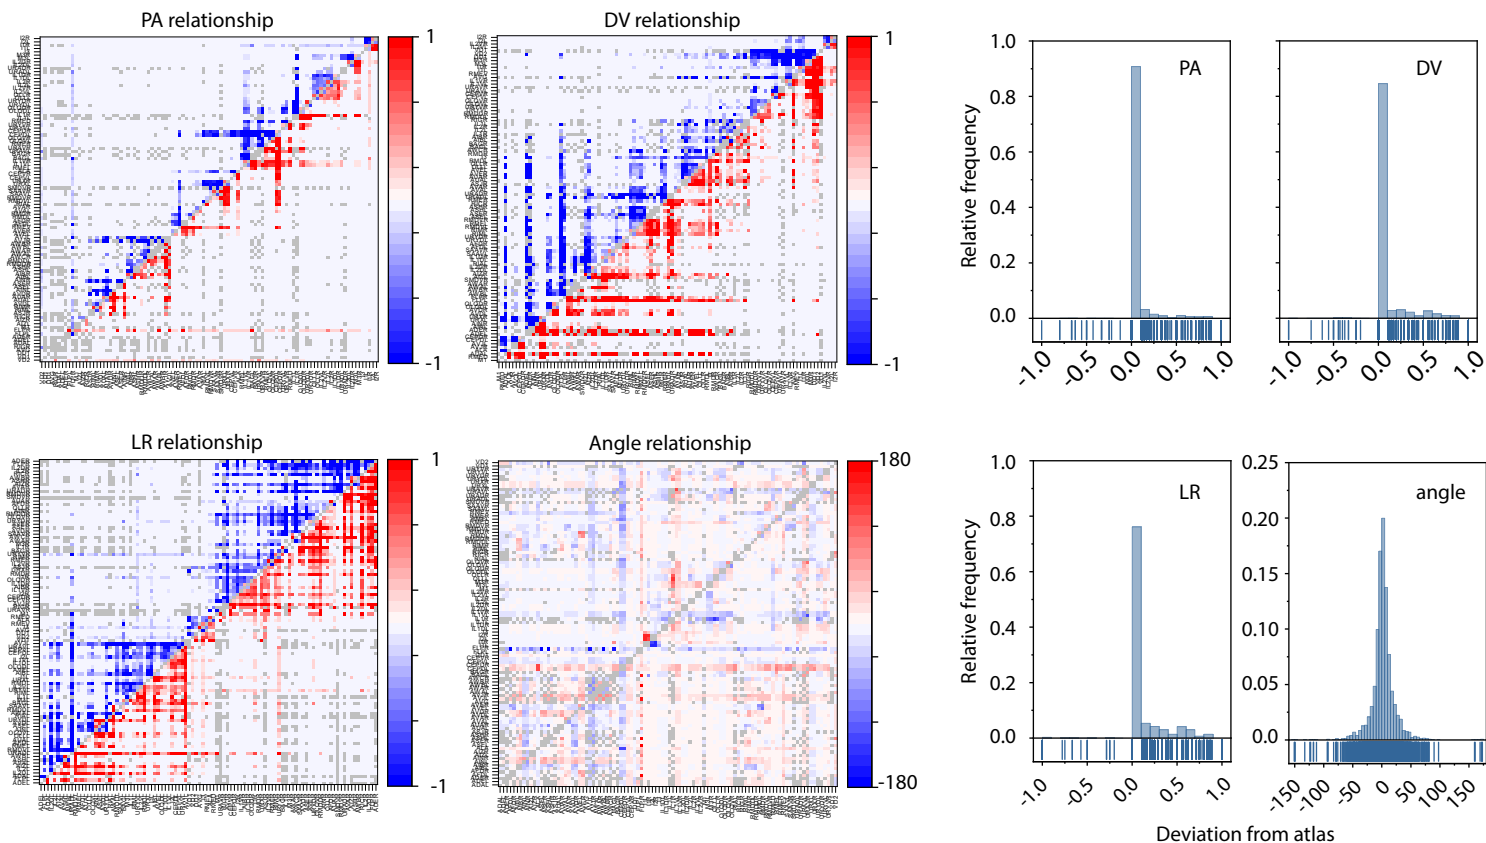

Supplement: supp [file elife-60321-supp-v1.zip]
